# Supplementary figures and images for: A Foundational Population Genetics Investigation of the Sexual Systems of Solanum (Solanaceae) in the Australian Monsoon Tropics Suggests Dioecious Taxa May Benefit from Increased Genetic Admixture via Obligate Outcrossing
Source: MDPI journal article supplement (doi:10.3390/plants12112200), 2023-06-02

**asym – Isolation by distance plot**

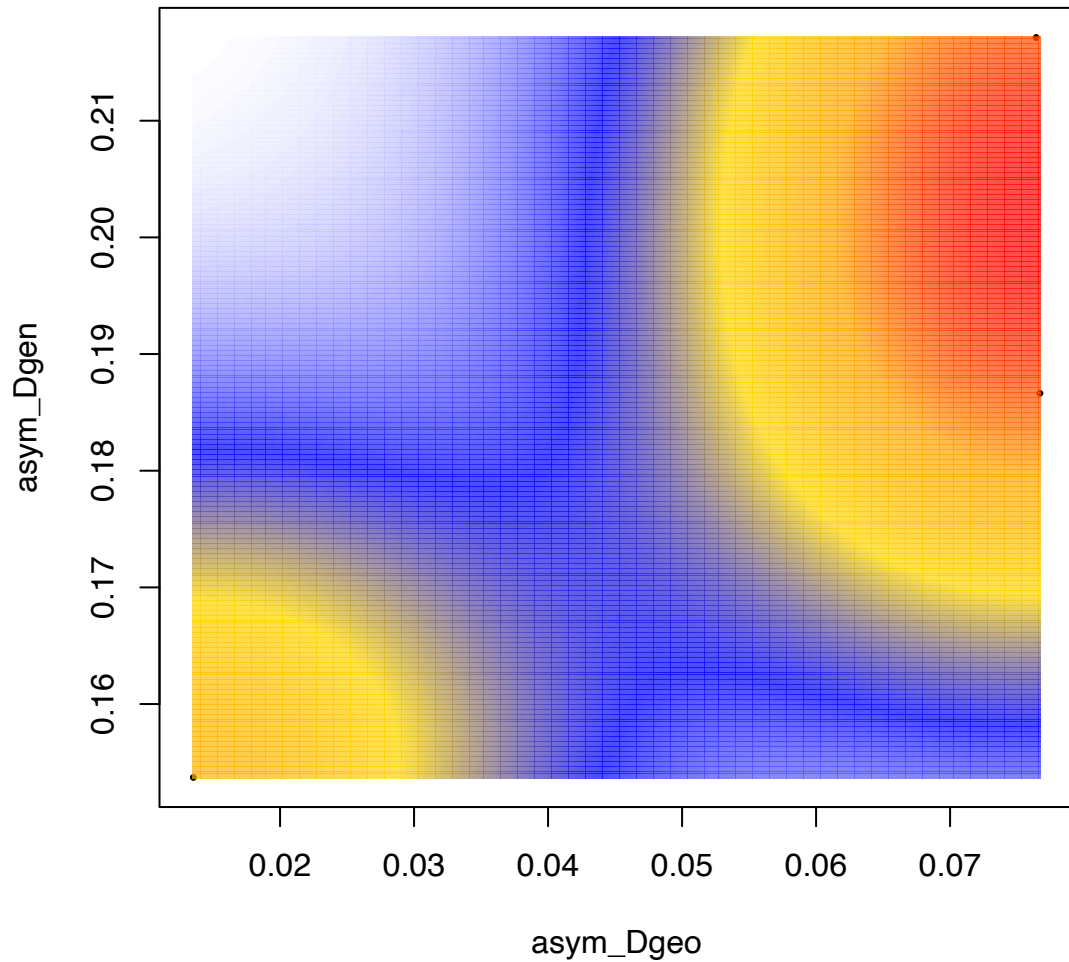

**raphi – Isolation by distance plot**

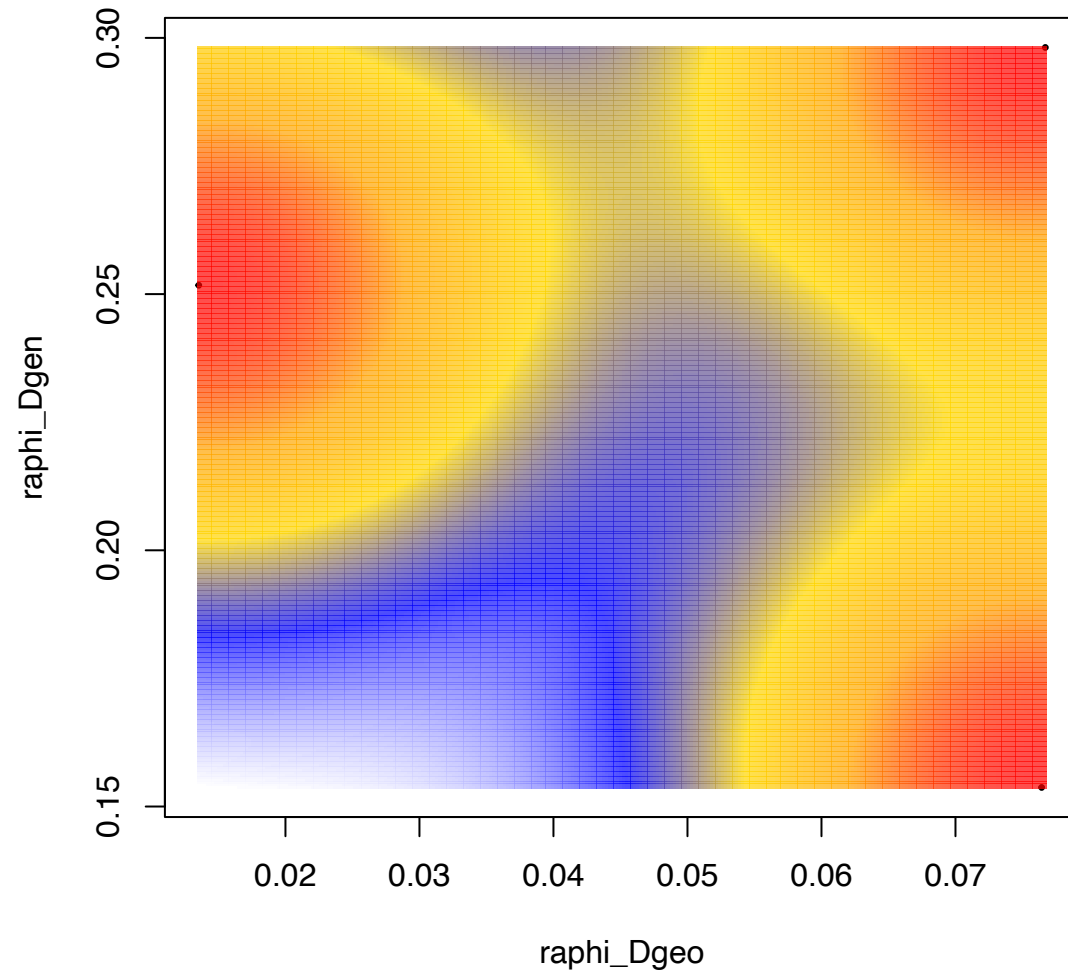

Supplement: s1 [file s1]
